# Supplementary material
Source: Springer Nature journal article supplement (https://www.springermedizin.de/resource/supplementary/12889_2010_3191_MOESM1_ESM.pdf/9488272)
Supplement: MOESM1 [file 9488272]

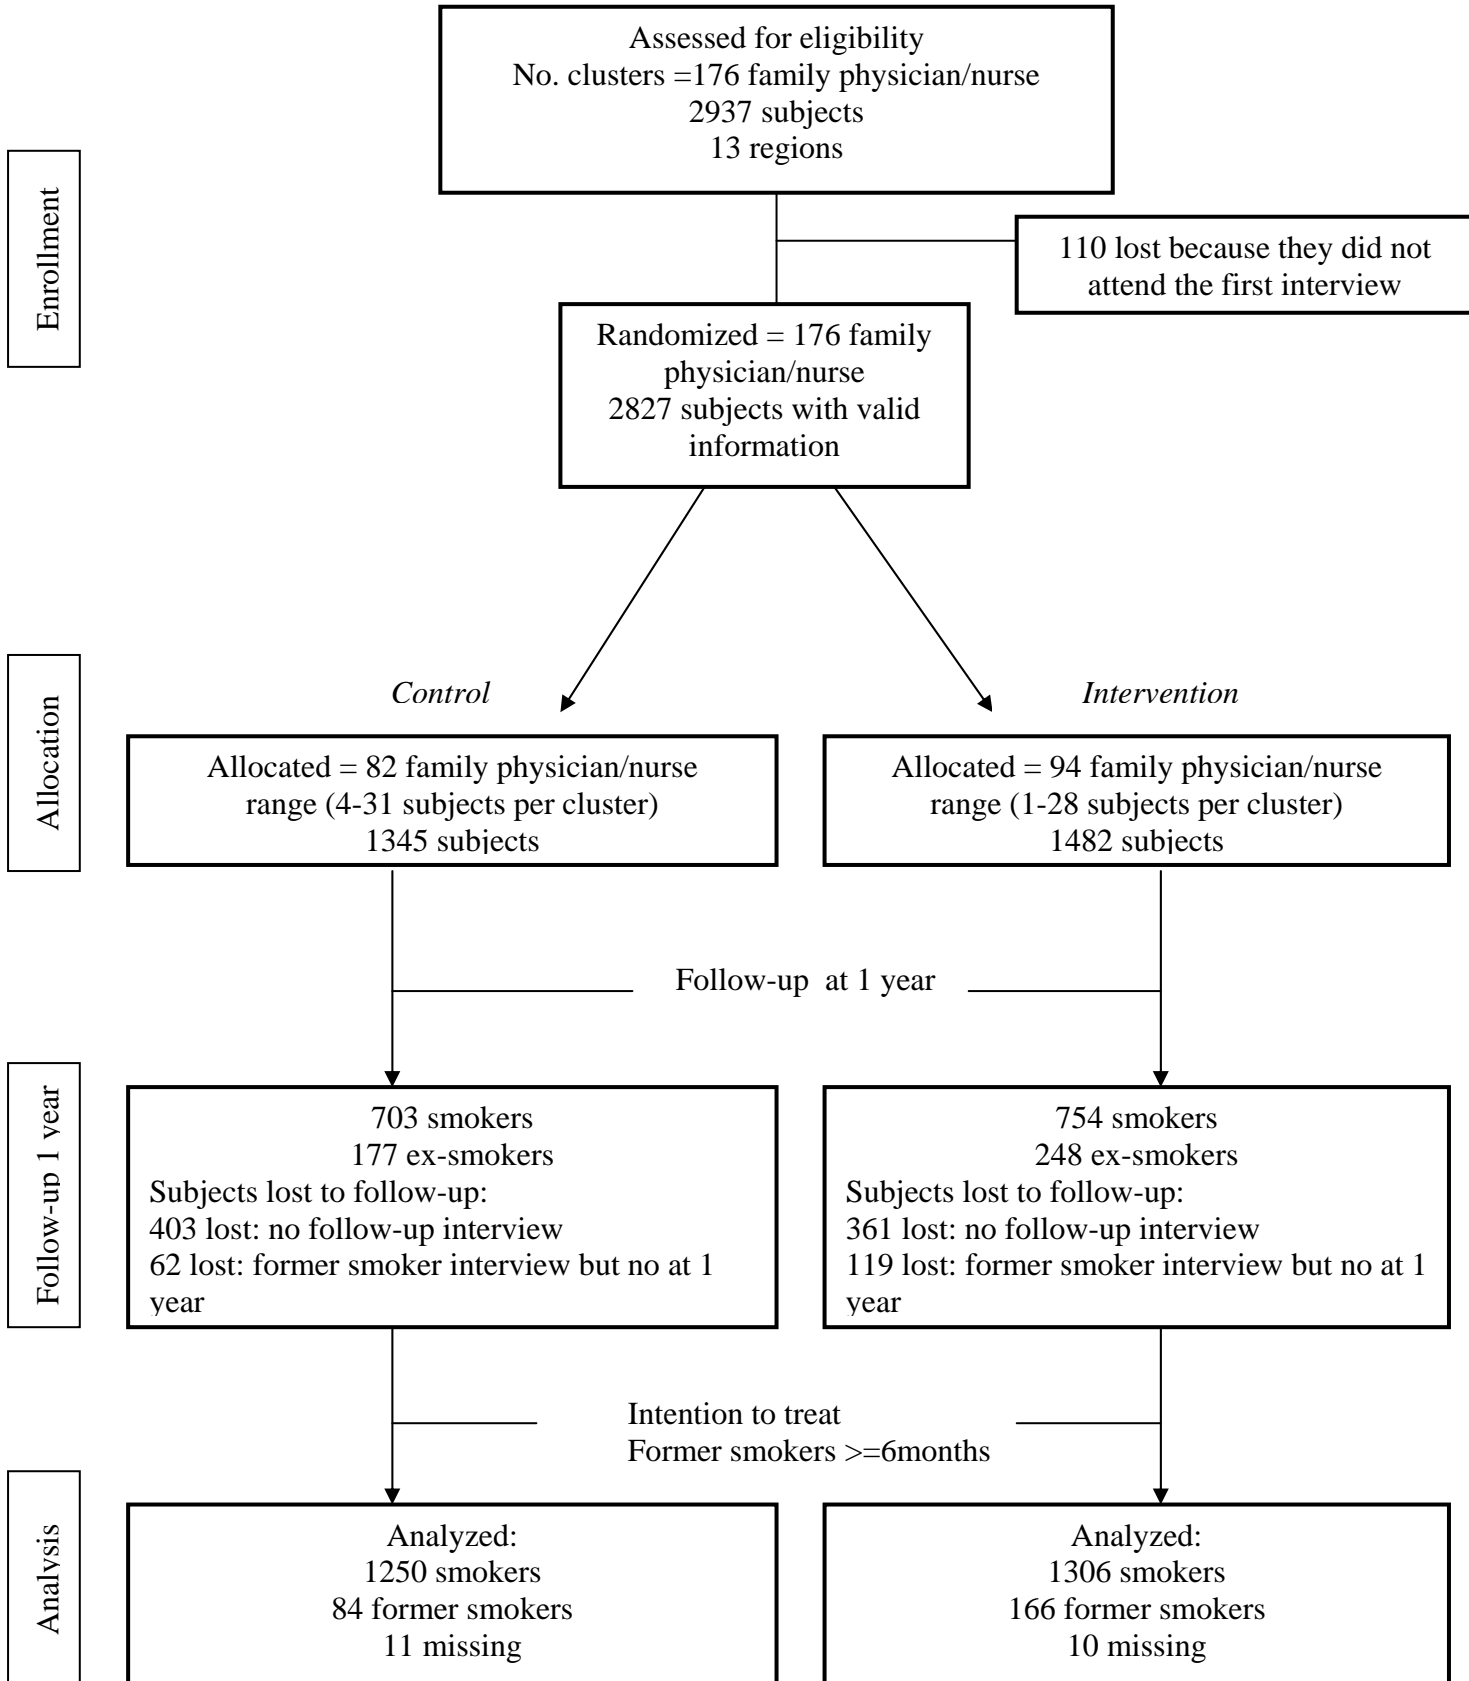

Assessed for eligibility  
No. clusters =176 family physician/nurse  
2937 subjects  
13 regions

110 lost because they did not attend the first interview

Randomized = 176 family physician/nurse  
2827 subjects with valid information

*Control*

*Intervention*

Allocated = 82 family physician/nurse  
range (4-31 subjects per cluster)  
1345 subjects

Allocated = 94 family physician/nurse  
range (1-28 subjects per cluster)  
1482 subjects

Follow-up at 1 year

703 smokers  
177 ex-smokers  
Subjects lost to follow-up:  
403 lost: no follow-up interview  
62 lost: former smoker interview but no at 1 year

754 smokers  
248 ex-smokers  
Subjects lost to follow-up:  
361 lost: no follow-up interview  
119 lost: former smoker interview but no at 1 year

Intention to treat  
Former smokers  $\geq 6$ months

Analyzed:  
1250 smokers  
84 former smokers  
11 missing

Analyzed:  
1306 smokers  
166 former smokers  
10 missing

Enrollment

Allocation

Follow-up 1 year

Analysis
